# Supplementary material for: High-performance liquid chromatography with resonance Rayleigh scattering detection for determining four tetracycline antibiotics
Source: Royal Society of Chemistry journal article supplement (doi:10.1039/c4ay01747a), 2014-01-01

Supplementary material

**High-performance liquid chromatography with resonance Rayleigh  
scattering detection for determining four tetracycline antibiotics**

**Xin Liu\*, Zilong Zhang\*, Jingdong Peng\*\*, Yuting He**

Chemistry and Chemical Engineering, Southwest University, Beibei District,  
Chongqing, P. R. China

**Running title:**

HPLC-RRS for determining four tetracycline antibiotics

**List of nonstandard abbreviations:**

resonance Rayleigh scattering (RRS), tetracycline (TC), oxytetracycline (OTC),  
chlortetracycline (CTC), doxycycline (DOTC), Titan yellow (TY), Britton–Robinson  
buffer solution (BR).

*\*These authors contributed equally to this work and should be considered co-first  
authors.*

*\*\*Correspondence: Professor Jingdong Peng, Chemistry and Chemical Engineering,  
Southwest University, Beibei District, Chongqing, P. R. China*

**Email:** *hxpengjd@swu.edu.cn*

**Fax:** +86-23-68254000

**Fig. 1** The RRS spectra: (1) TC, (2) OTC, (3) CTC, (4) DOTC, (5) TY, (6) Cu(II), (7) TY-Cu(II), (8) TY-Cu(II)-TC, (9) TY-Cu(II)-OTC, (10) TY-Cu(II)-CTC, (11) TY-Cu(II)-DOTC.

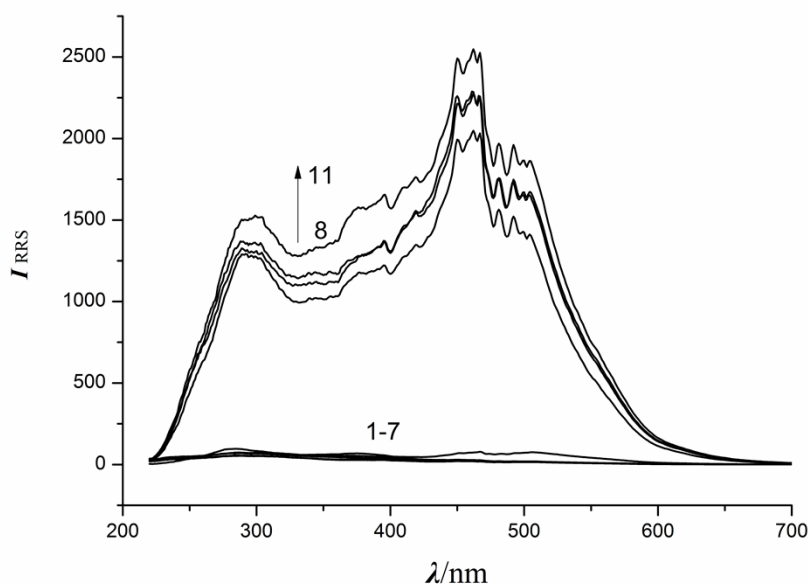

**Fig. 2** Effect of the mobile phase flow rate on the signal intensity in HPLC-RRS.

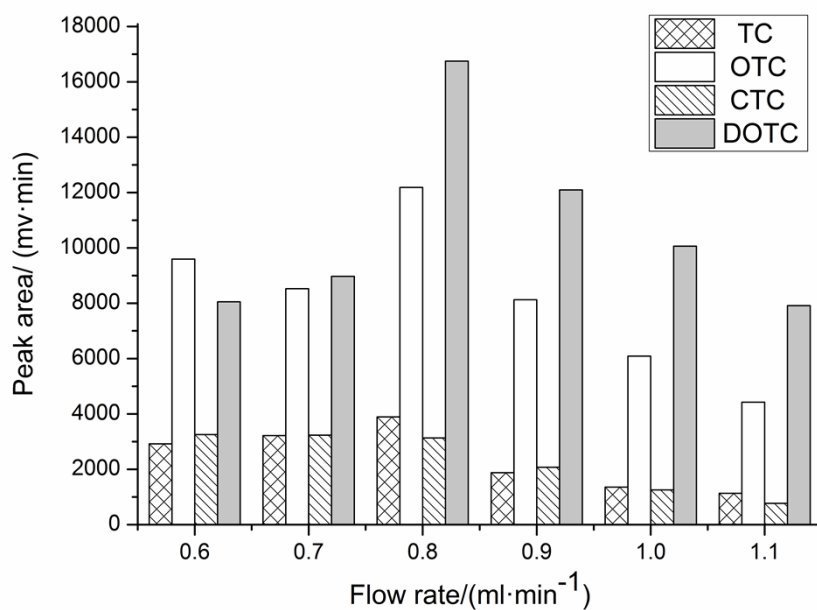

**Fig. 3** The influence of pH of the BR on the signal intensity.

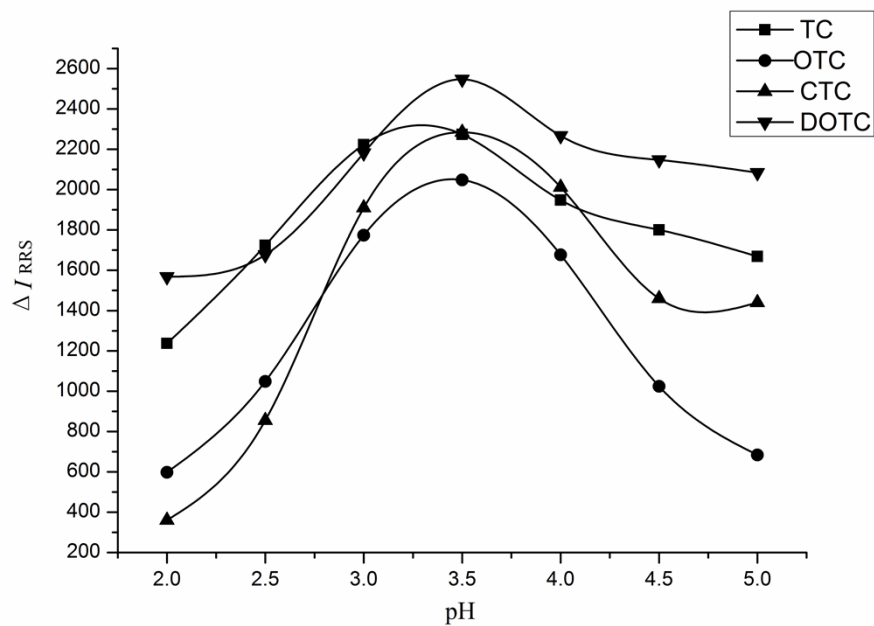

**Fig. 4** A: The reaction equation for the formation of chelate cation  $[\text{Cu} \cdot \text{TC}]^+$ ; B: The structure of  $[\text{Cu} \cdot \text{TC}]_2\text{TY}$ .

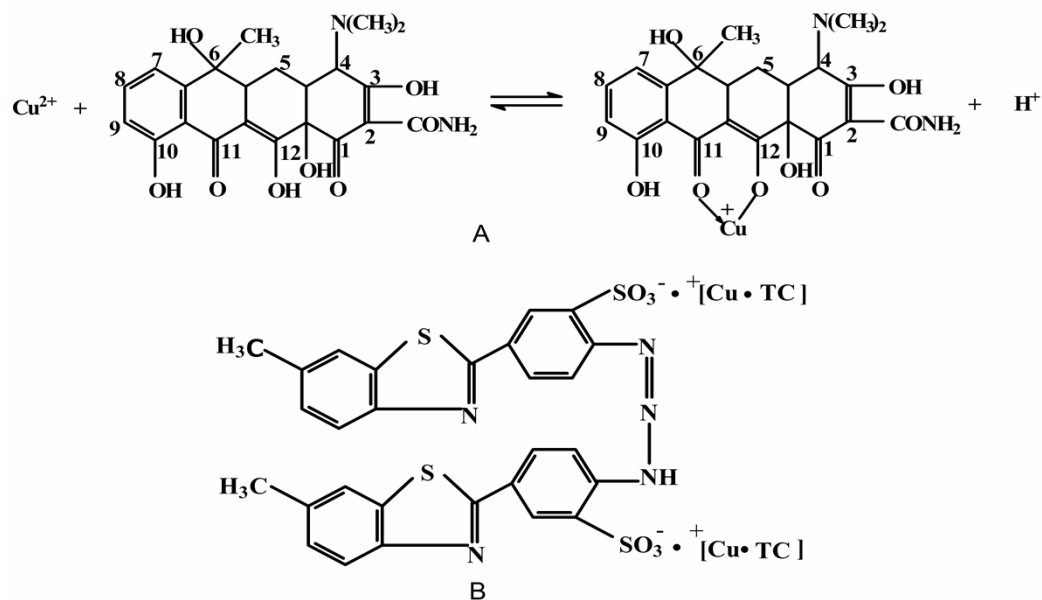

Supplement: c4ay01747a1.pdf [file c4ay01747a1.pdf]
